# Supplementary material for: High performance cobalt nanoparticle catalysts supported by carbon for ozone decomposition: the effects of the cobalt particle size and hydrophobic carbon support
Source: Royal Society of Chemistry journal article supplement (doi:10.1039/d0nj04876c), 2020-11-20
Supplement: d0nj04876c1.pdf [file d0nj04876c1.pdf]

## Supporting information

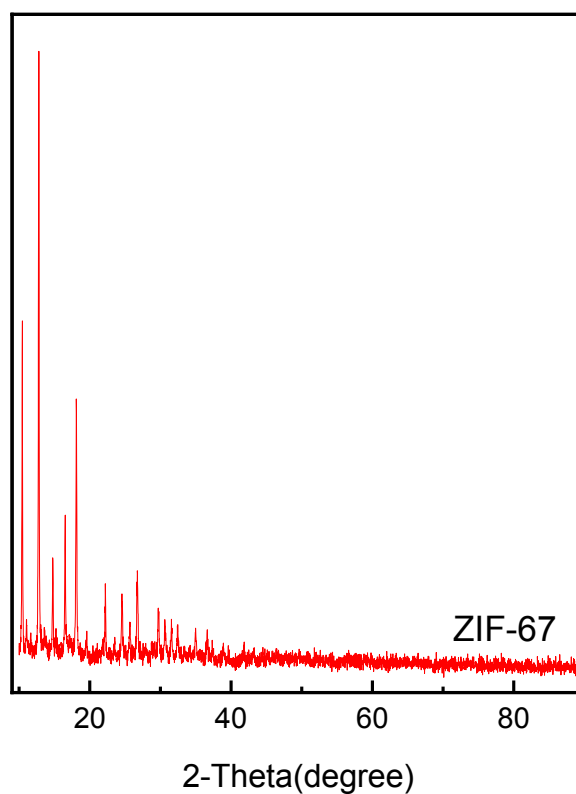

**Figure S1.** The XRD pattern of pristine ZIF-67.

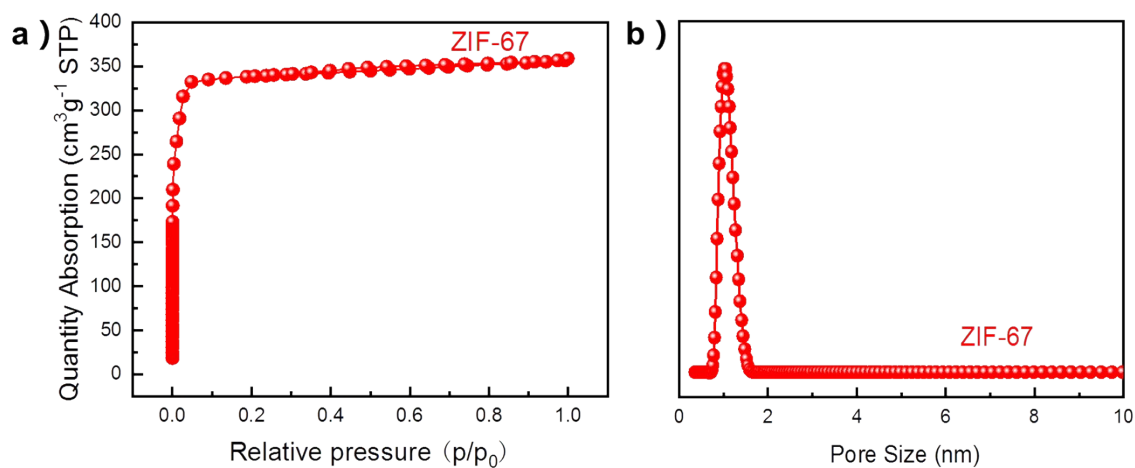

**Figure S2.** The N<sub>2</sub> adsorption-desorption isotherms and pore size distribution of ZIF-67.

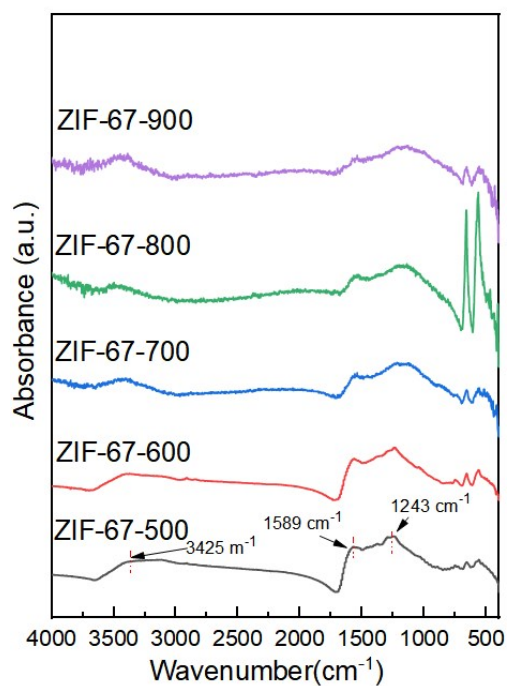

**Figure S3.** FT-IR spectra of carbonized ZIF-67 catalysts.

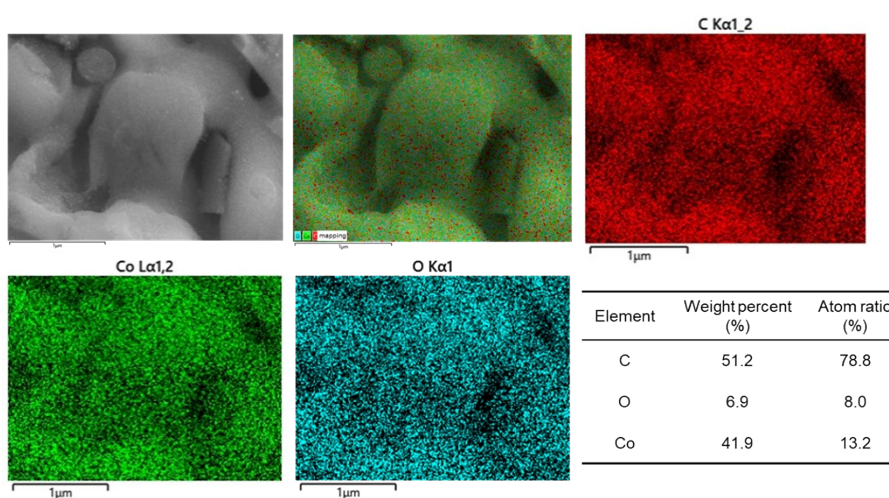

**Figure S4.** Element mapping and SEM-EDX analysis of ZIF-67-500 catalyst.

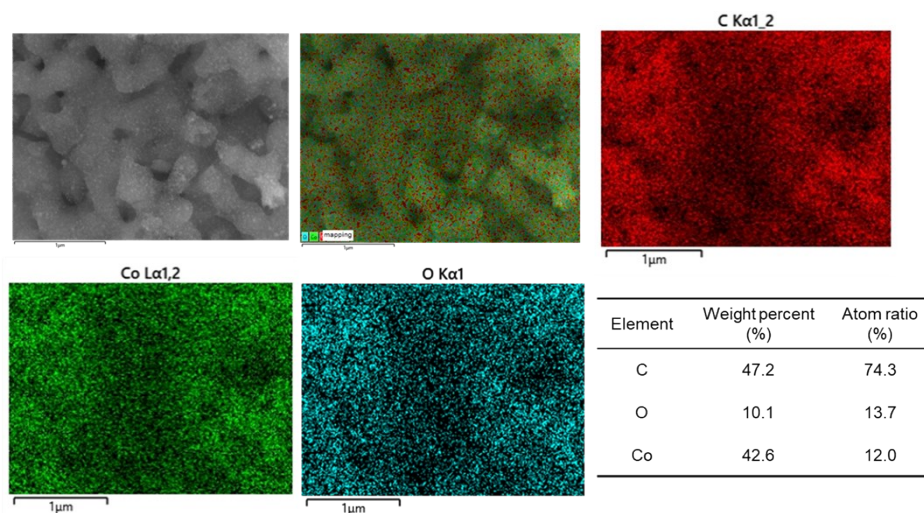

**Figure S5.** Element mapping and SEM-EDX analysis of ZIF-67-600 catalyst.

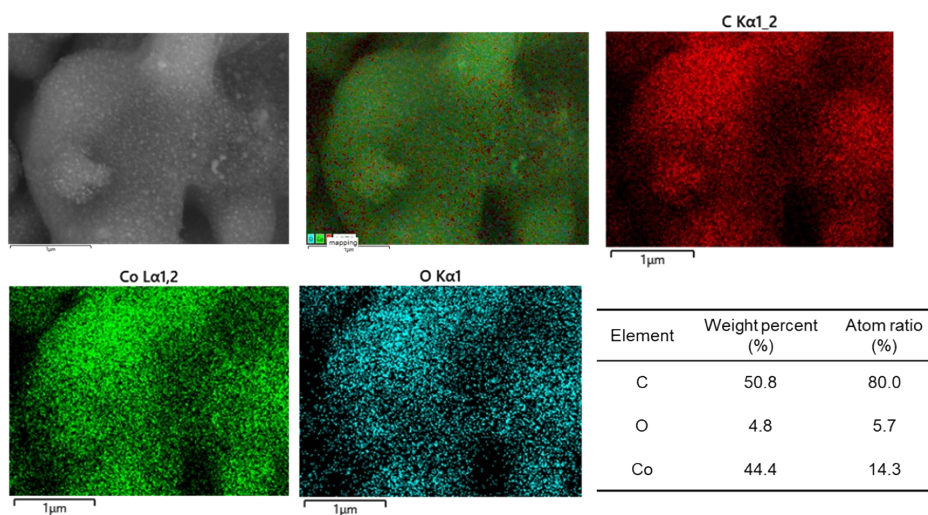

**Figure S6.** Element mapping and SEM-EDX analysis of ZIF-67-700 catalyst.

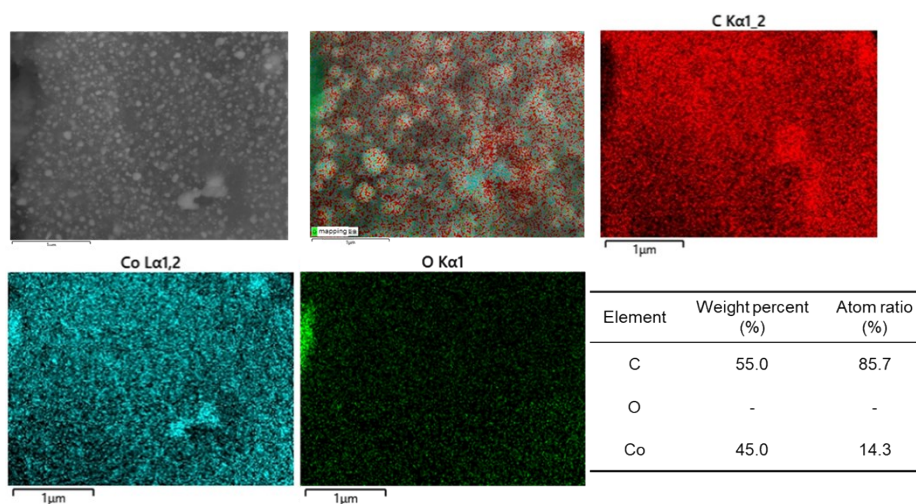

**Figure S7.** Element mapping and SEM-EDX analysis of ZIF-67-800 catalyst.

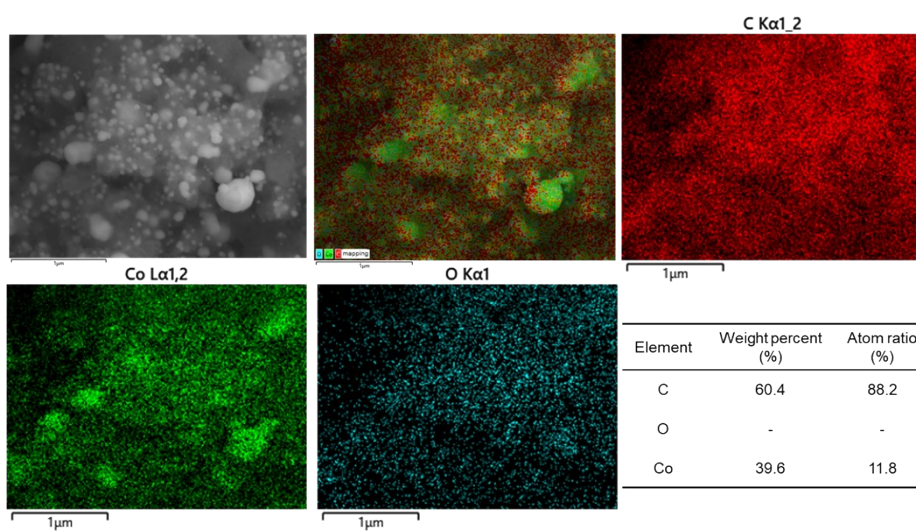

**Figure S8.** Element mapping and SEM-EDX analysis of ZIF-67-900 catalyst.

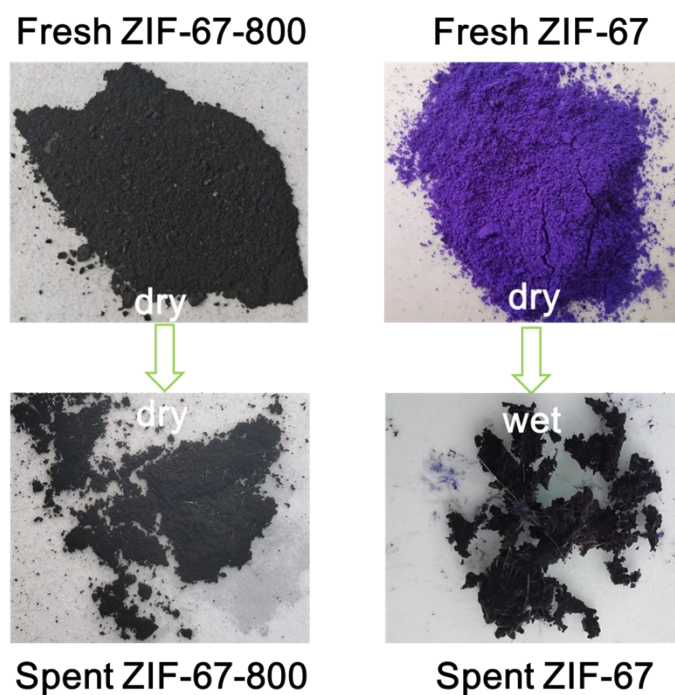

**Figure S9.** Picture comparison of carbonized ZIF-67 and ZIF-67 after ozone decomposition under high humidity (RH=90%).

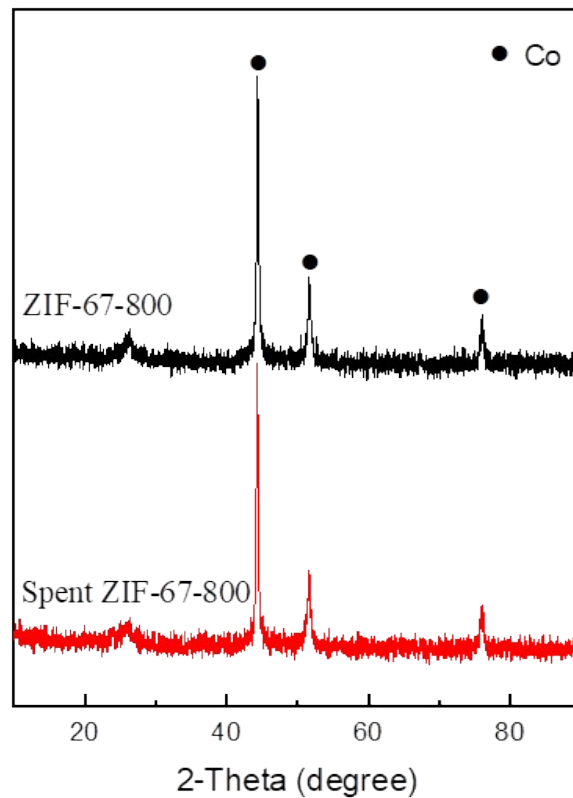

**Figure S10.** The XRD patterns of fresh and spent ZIF-67-800 catalysts.

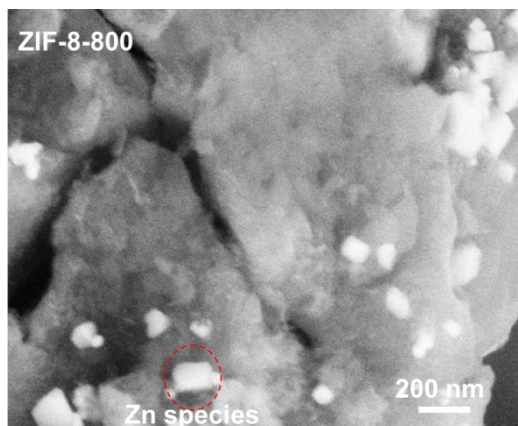

**Figure S11.** The SEM picture of ZIF-8-800.

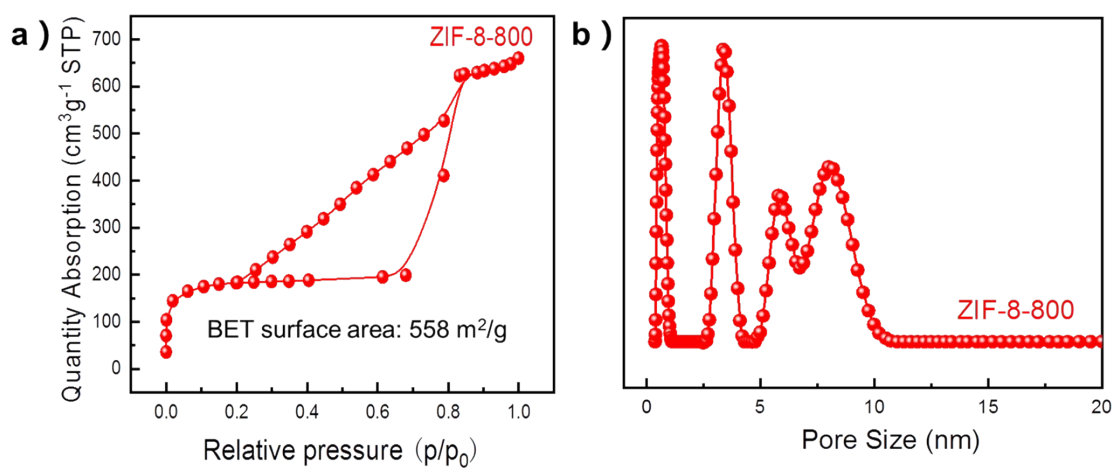

**Figure S12.** The  $\text{N}_2$  adsorption-desorption isotherms and pore size distribution of ZIF-8-800 catalysts.

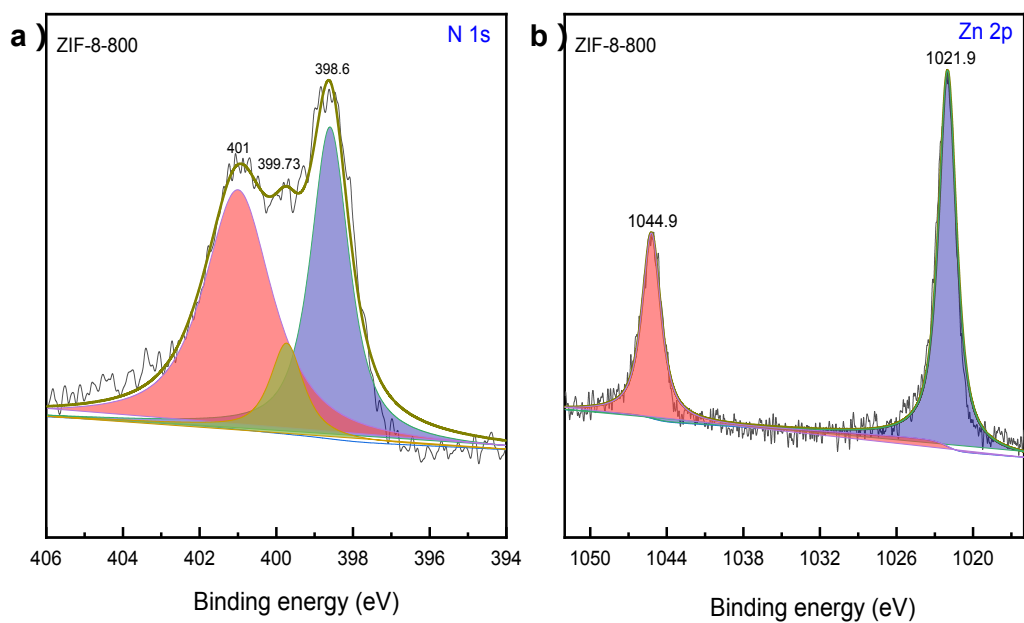

**Figure S13.** The XPS of N1s on the ZIF-8-800 catalysts.

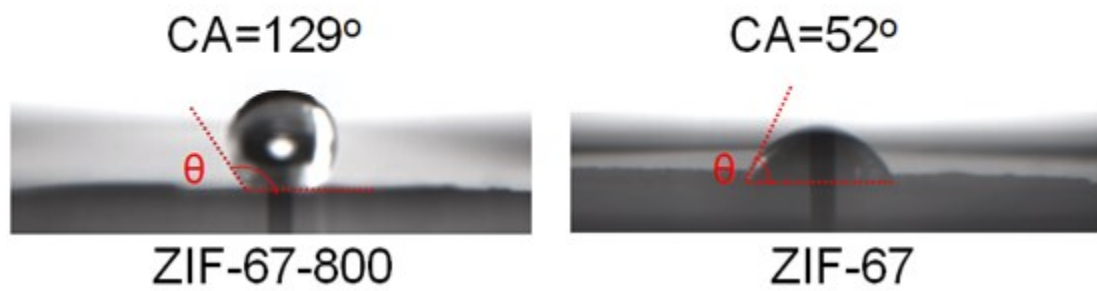

**Figure S14.** Pictures of water contact angle on ZIF-67-800 and ZIF-67 surface.

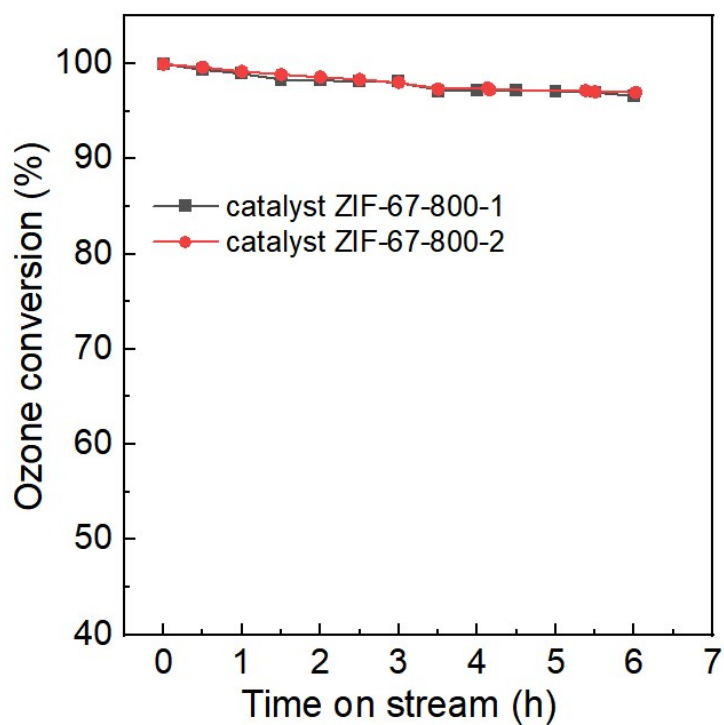

**Figure S15.** The reproducibility test of ZIF-67-800 catalyst.

**Table S1.** XRD analysis of cobalt species on carbonized ZIF-67 catalysts.

| Catalysts  | Structure | phase       | Crystallite size (nm) |
|------------|-----------|-------------|-----------------------|
| ZIF-67-500 | cubic     | metallic Co | 15.2                  |
| ZIF-67-600 | cubic     | metallic Co | 15.9                  |
| ZIF-67-700 | cubic     | metallic Co | 17.5                  |
| ZIF-67-800 | cubic     | metallic Co | 25.3                  |
| ZIF-67-900 | cubic     | metallic Co | 38.6                  |



**Table S2.** The stability comparison of ZIF-67-800 with reported works.

| Catalysts                                 | O <sub>3</sub> (ppm) | T (°C) | RH (%) | Reaction time (h) | O <sub>3</sub> conversion (%) | Ref.      |
|-------------------------------------------|----------------------|--------|--------|-------------------|-------------------------------|-----------|
| ZIF-67-800                                | 23                   | 20     | 90     | 6                 | 100                           | This work |
| ZIF-67-800                                | 23                   | 20     | 90     | 36                | 95%                           | This work |
| MnOMn <sub>2</sub> N <sub>0.86</sub> @850 | 23                   | 20     | 90     | 6                 | 6                             | 1         |
| CeMn <sub>10</sub> O <sub>x</sub>         | 40                   | 30     | 65     | 6                 | 96                            | 2         |
| MIL-100(Fe)                               | 45                   | 25     | 90     | 12                | 100                           | 3         |
| Cu <sub>2</sub> O/rGO                     | 20                   | 25     | 80     | 10                | 98                            | 4         |
| Ag-MnO <sub>x</sub> -H                    | 40                   | 25     | 60     | 6                 | 90                            | 5         |
| OMS-2-Ac                                  | 40                   | 30     | 90     | 6                 | 80                            | 6         |
| Ce-OMS-2                                  | 40                   | 25     | 90     | 6                 | 90                            | 7         |
| 8%AgMnO <sub>x</sub>                      | 40                   | 30     | 65     | 6                 | 81                            | 8         |
| V-MnO <sub>2</sub>                        | 110                  | 25     | 55     | 5                 | 50                            | 9         |
| Ni/NiO pH-1                               | 1000                 | 25     | 90     | 8                 | 98                            | 10        |
| S-300 (MnO <sub>x</sub> )                 | 43                   | 25     | 25     | 6                 | 80                            | 11        |
| S-300 (MnO <sub>x</sub> )                 | 43                   | 25     | 50     | 6                 | 65                            | 11        |
| S-300 (MnO <sub>x</sub> )                 | 43                   | 25     | 75     | 6                 | 10                            | 11        |
| 1.1% MnO <sub>x</sub> /AC                 | 43-48                | 25     | 60     | 6                 | 83                            | 12        |

### Reference

1. C. Fang, C. Hu, D. Li, J. Chen and M. Luo, *New J. Chem.*, **2020**, *44*, 17993-17999.
2. J. Ma, X. Lia, C. Zhang, Q. Ma and H. He, *Appl. Catal. B Environ.*, 2020, **264**, 118498.  
DOI: 10.1016/j.apcatb.2019.118498.
3. H. Wang, P. Rassu, X. Wang, H. Li, X. Wang, X. Wang, X. Feng, A. Yin, P. Li, X. Jin, S. Chen, X. Ma and B. Wang, *Angew. Chem. Int. Ed. Engl.*, 2018, **50**, 16416-16420.
4. S. Gong, J. Chen, X. Wu, N. Han and Y. Chen, *Catal. Commun.*, 2018, **106**, 25-29.
5. H. Deng, S. Kang, J. Ma, L. Wang, C. Zhang and H. He, *Environ. Sci. Technol.*, 2019, **53**, 10871-10879.
6. C. Wang, J. Ma, F. Liu, H. He and R. Zhang, *J. Phys. Chem. C.*, 2015, **119**, 23119-23126.
7. L. Yang, J. Ma, X. Li, C. Zhang and H. He, *Ind. Eng. Chem. Res.*, 2020, **59**, 118-128.
8. X. Li, J. Ma, C. Zhang, R. Zhang and H. He, *J. Environ. Sci.*, 2019, **80**, 159-168.

9. Y. Yang, P. Zhang and J. Jia, *Appl. Surf. Sci.*, 2019, **484**, 45-53.
10. S. Gong, A. Wang, Y. Wang, H. Liu, N. Han and Y. Chen, *ACS Appl. Nano Mater.*, 2020, **3**, 597-607.
11. Y. Liu, P. Zhang, J. Zhan and L. Liu, *Appl. Surf. Sci.*, 2019, **463**, 374-385.
12. M. Wang, P. Zhang, J. Li and C. Jiang, *Chin. J. Catal.*, 2014, **35**, 335-341.
